# Supplementary material for: Identification of the Potential Genes Regulating Seed Germination Speed in Maize
Source: MDPI journal article supplement (doi:10.3390/plants11040556), 2022-02-19
Supplement: s1 [file s1]

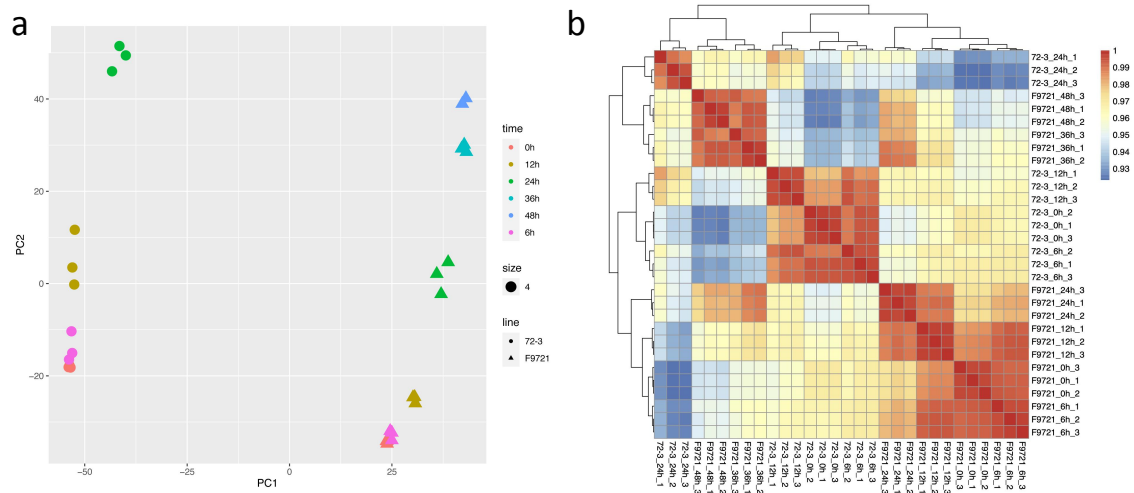

Supplementary Figure S1: Overall analysis of the transcriptome data. (a) PCA plot of the two inbred lines transcriptome change during seed germination. (b) Pearson correlation coefficients heat map between samples from 72-3 and F9721 at six germination stages.

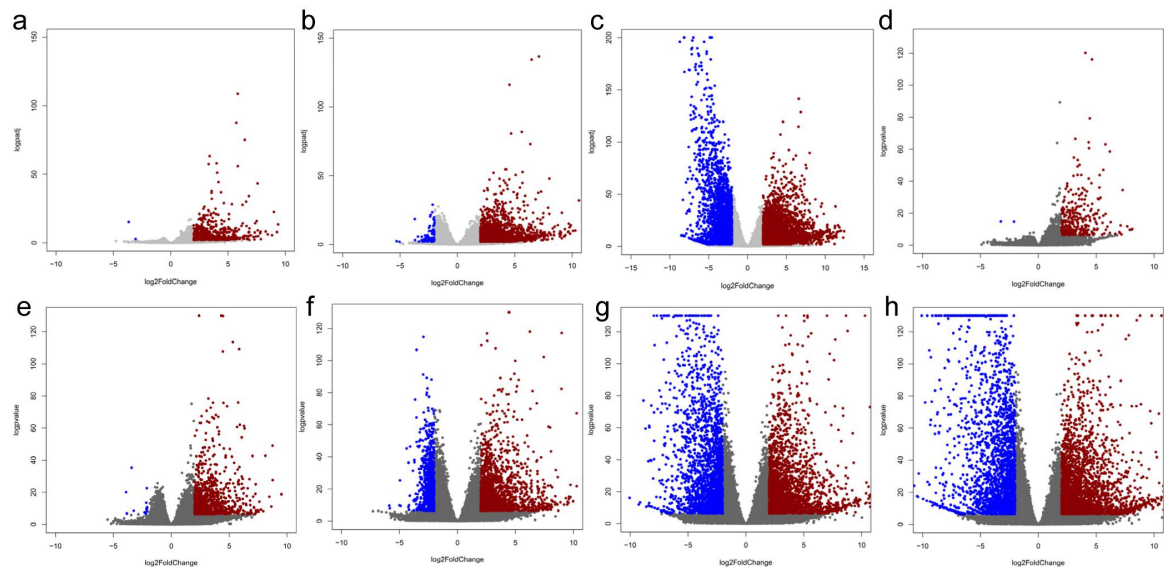

Supplementary Figure S2: Volcano plots of DEGs between different imbibition stages. (a) Volcano plot of DEGs for 72-3 6 HAI versus 0 HAI. (b) Volcano plot of DEGs for 72-3 12HAI versus 0 HAI. (c) Volcano plot of DEGs for 72-3 24 HAI versus 0 HAI. (d) Volcano plot of DEGs for F9721 6 HAI versus 0 HAI. (e) Volcano plot of DEGs for F9721 12 HAI versus 0 HAI. (f) Volcano plot of DEGs for F9721 24 HAI versus 0 HAI. (g) Volcano plot of DEGs for F9721 36 HAI versus 0 HAI. (h) Volcano plot of DEGs for F9721 48 HAI versus 0 HAI.

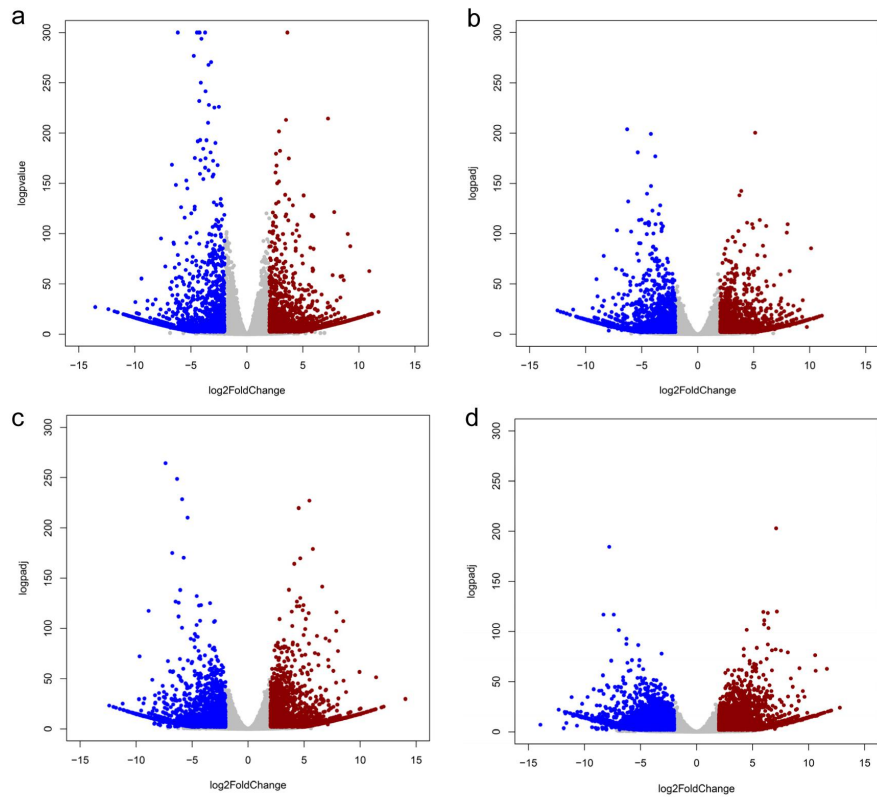

Supplementary Figure S3: Volcano plots of DEGs between 72-3 and F9721 (a) Volcano plot of DEGs for 72-3 versus F9721 at 0 HAI. (b) Volcano plot of DEGs for 72-3 versus F9721 at 6 HAI. (c) Volcano plot of DEGs for 72-3 versus F9721 at 12 HAI. (d) Volcano plot of DEGs for 72-3 versus F9721 at 24 HAI.

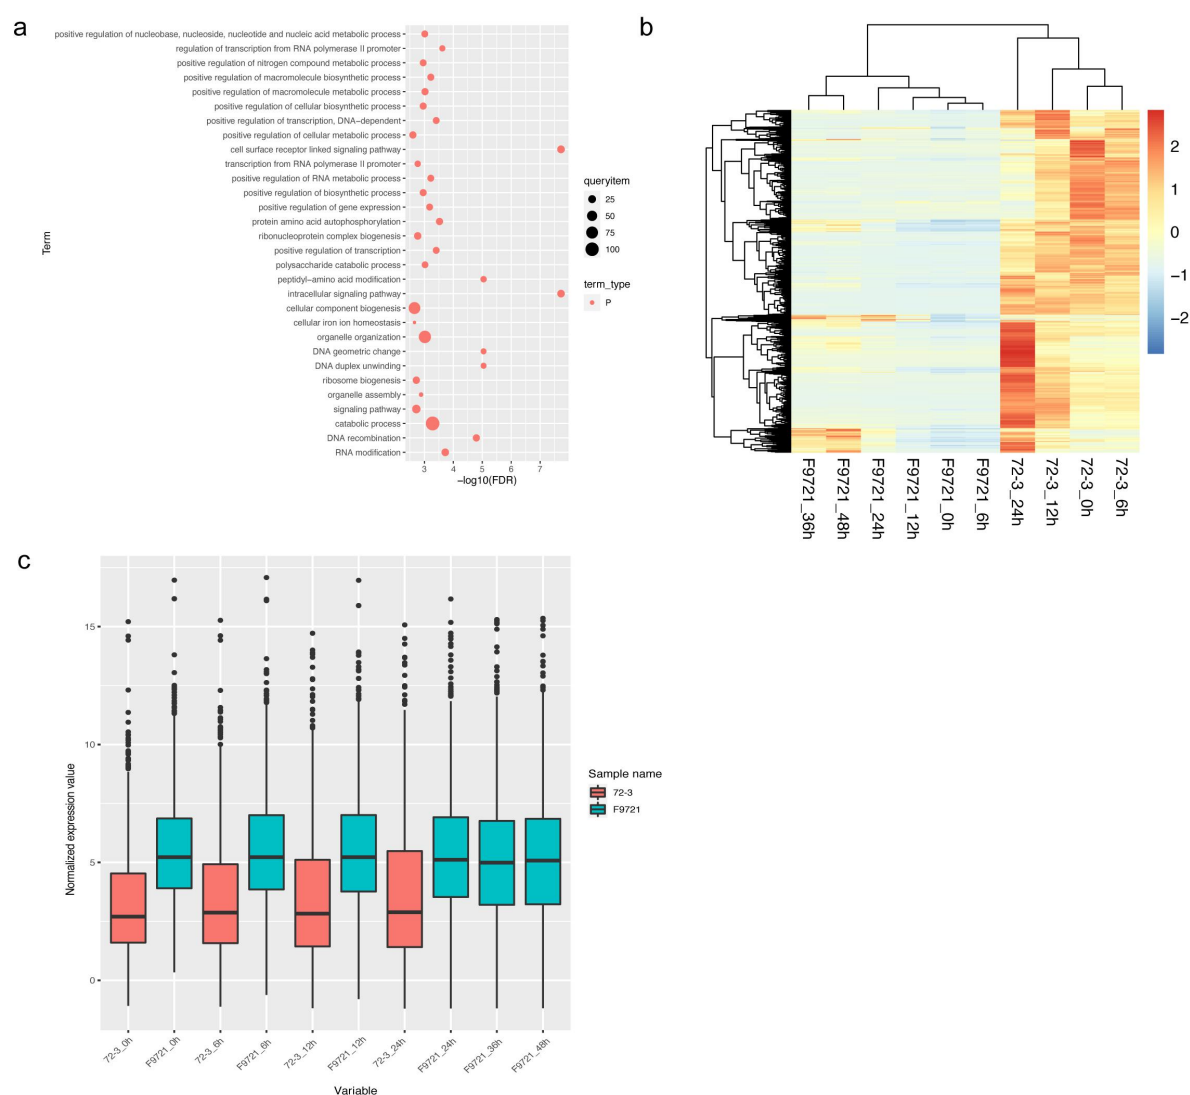

Supplementary Figure S4: Expression pattern of differential expressed stored mRNAs and GO enrichment. (a) GO enrichment of differential expressed stored mRNAs in dry seeds between 72-3 and F9721. (b) Expression pattern of up-regulated stored mRNAs in 72-3 versus F9721 during seed germination. (c) Expression pattern of down-regulated stored mRNAs in 72-3 versus F9721 during seed germination.

Supplementary Table S1: Summary of reads alignment with B73 reference genome  
APGv4

| Samples     | Pair-end reads number | GC content (%) | Mapping rate |
|-------------|-----------------------|----------------|--------------|
| 72-3_0h_1   | 11655657;11655657     | 54;54          | 92.78%       |
| 72-3_0h_2   | 11791262;11791262     | 54;54          | 92.66%       |
| 72-3_0h_3   | 12061984;12061984     | 53;53          | 92.78%       |
| 72-3_12h_1  | 17835078;17835078     | 53;53          | 93.25%       |
| 72-3_12h_2  | 14910260;14910260     | 55;55          | 93.92%       |
| 72-3_12h_3  | 11815028;11815028     | 54;54          | 92.97%       |
| 72-3_24h_1  | 16773188;16773188     | 54;54          | 95.12%       |
| 72-3_24h_2  | 12216469;12216469     | 53;52          | 94.22%       |
| 72-3_24h_3  | 14059372;14059372     | 53;53          | 95.62%       |
| 72-3_6h_1   | 13305083;13305083     | 55;54          | 93.00%       |
| 72-3_6h_2   | 14112810;14112810     | 56;56          | 93.54%       |
| 72-3_6h_3   | 13893967;13893967     | 55;55          | 93.23%       |
| F9721_0h_1  | 15375316;15375316     | 55;55          | 90.06%       |
| F9721_0h_2  | 12888583;12888583     | 55;55          | 88.53%       |
| F9721_0h_3  | 14573350;14573350     | 54;54          | 88.31%       |
| F9721_12h_1 | 17303918;17303918     | 57;57          | 88.99%       |
| F9721_12h_2 | 17143408;17143408     | 56;56          | 89.57%       |
| F9721_12h_3 | 14655576;14655576     | 55;55          | 88.58%       |
| F9721_24h_1 | 13682849;13682849     | 55;55          | 90.04%       |
| F9721_24h_2 | 14605629;14605629     | 55;55          | 88.17%       |
| F9721_24h_3 | 15558163;15558163     | 55;55          | 89.49%       |
| F9721_36h_1 | 13495568;13495568     | 53;53          | 90.44%       |
| F9721_36h_2 | 14579617;14579617     | 54;54          | 89.99%       |
| F9721_36h_3 | 13066391;13066391     | 51;51          | 91.06%       |
| F9721_48h_1 | 12172336;12172336     | 54;53          | 91.20%       |
| F9721_48h_2 | 13249328;13249328     | 54;54          | 90.70%       |
| F9721_48h_3 | 13868005;13868005     | 51;51          | 90.92%       |
| F9721_6h_1  | 12888169;12888169     | 54;54          | 88.95%       |
| F9721_6h_2  | 15938142;15938142     | 56;56          | 88.63%       |
| F9721_6h_3  | 15904529;15904529     | 56;56          | 88.96%       |

Supplementary Table S2: Gene list of 2 Mb candidate locus

| Gene id        | Description                                                 |
|----------------|-------------------------------------------------------------|
| Zm00001d004505 | drug resistance transporter-like ABC domain protein         |
| Zm00001d007916 | uncharacterized                                             |
| Zm00001d011289 | Malic enzyme1                                               |
| Zm00001d012623 | Malic enzyme 2                                              |
| Zm00001d018978 | uncharacterized                                             |
| Zm00001d025415 | phosphoprotein phosphatase inhibitors                       |
| Zm00001d027292 | scarecrow-like protein 6                                    |
| Zm00001d027293 | signal recognition particle receptor homolog 1              |
| Zm00001d027295 | beta tubulin1                                               |
| Zm00001d027296 | DUF3527 domain protein                                      |
| Zm00001d027298 | uncharacterized LOC100275685                                |
| Zm00001d027299 | mediator of RNA polymerase II transcription subunit 12-like |
| Zm00001d027300 | protein PAIR1                                               |
| Zm00001d027302 | uncharacterized                                             |
| Zm00001d027303 | Pleiotropic drug resistance protein 2                       |
| Zm00001d027304 | ATPase 9, plasma membrane-type                              |
| Zm00001d027305 | uncharacterized                                             |
| Zm00001d027306 | F-box protein                                               |
| Zm00001d027307 | cingulin                                                    |
| Zm00001d027308 | RING/U-box superfamily protein                              |
| Zm00001d027309 | uncharacterized                                             |
| Zm00001d027310 | vegetative cell wall protein gp1                            |
| Zm00001d027311 | uncharacterized                                             |
| Zm00001d027312 | putative RING zinc finger domain superfamily protein        |
| Zm00001d027313 | hydrolase protein 32                                        |
| Zm00001d027314 | uncharacterized                                             |
| Zm00001d027315 | uncharacterized                                             |
| Zm00001d027317 | rolled leaf 2                                               |
| Zm00001d027318 | uncharacterized                                             |
| Zm00001d027319 | 4-phosphopantetheinyl transferase sfp                       |
| Zm00001d027320 | CemA-like proton extrusion protein-related                  |
| Zm00001d027321 | putative peptidyl-prolyl cis-trans isomerase family protein |
| Zm00001d027322 | Protein weak chloroplast movement under blue light 1        |
| Zm00001d027323 | uncharacterized                                             |
| Zm00001d027324 | THO complex subunit 1                                       |
| Zm00001d027325 | peptidoglycan-binding LysM domain-containing protein        |
| Zm00001d027326 | uncharacterized                                             |
| Zm00001d027329 | DNA cytosine methyltransferase Zmet 3                       |
| Zm00001d027330 | uncharacterized                                             |
| Zm00001d027332 | Nonspecific lipid-transfer protein                          |

|                |                                                                 |
|----------------|-----------------------------------------------------------------|
| Zm00001d027333 | uncharacterized                                                 |
| Zm00001d027334 | uncharacterized                                                 |
| Zm00001d027335 | trihelix transcription factor GTL1                              |
| Zm00001d027337 | kinesin-like protein KIN-14E                                    |
| Zm00001d027338 | uncharacterized                                                 |
| Zm00001d027339 | RNA binding protein                                             |
| Zm00001d027340 | ATP binding protein                                             |
| Zm00001d027341 | ATP binding protein                                             |
| Zm00001d027342 | uncharacterized                                                 |
| Zm00001d027343 | fertility restorer                                              |
| Zm00001d027344 | molybdate-anion transporter                                     |
| Zm00001d027345 | mitochondrial import inner membrane translocase subunit TIM23-2 |
| Zm00001d027346 | early nodulin-like protein 1                                    |
| Zm00001d027347 | uncharacterized                                                 |
| Zm00001d027348 | uncharacterized                                                 |
| Zm00001d027349 | pentatricopeptide repeat-containing protein At3g53170           |
| Zm00001d027350 | uncharacterized                                                 |
| Zm00001d027351 | uncharacterized                                                 |
| Zm00001d027352 | Pyridoxine/pyridoxamine 5'-phosphate oxidase 2                  |
| Zm00001d027353 | retinol dehydrogenase 12                                        |
| Zm00001d027354 | mitochondrial inner membrane protein OXA1-like                  |
| Zm00001d027355 | membrane protein                                                |
| Zm00001d027359 | uncharacterized                                                 |
| Zm00001d027360 | Probable protein phosphatase 2C 33                              |
| Zm00001d027361 | ATPP2-A13                                                       |
| Zm00001d027362 | uncharacterized                                                 |
| Zm00001d027363 | uncharacterized                                                 |
| Zm00001d027365 | vacuolar protein 8                                              |
| Zm00001d027366 | Peroxisomal membrane protein PEX11-1                            |
| Zm00001d027367 | riboflavin biosynthesis protein ribD                            |
| Zm00001d027368 | xyloglucan endotransglucosylase/hydrolase protein 5             |
| Zm00001d027369 | Protein-ribulosamine 3-kinase chloroplastic                     |
| Zm00001d027370 | uncharacterized LOC100192905                                    |
| Zm00001d027371 | putative TCP-1/cpn60 chaperonin family protein                  |
| Zm00001d039633 | uncharacterized                                                 |
| Zm00001d040069 | Probable glucuronoxylan glucuronosyltransferase IRX7            |
| Zm00001d047177 | TATA-binding protein-associated factor BTAF1                    |
| Zm00001d048502 | COP9 signalosome complex subunit 1                              |
| Zm00001d048507 | uncharacterized                                                 |
| Zm00001d048510 | uncharacterized                                                 |
| Zm00001d048511 | AP-2 complex subunit alpha-2                                    |
| Zm00001d048527 | rolled leaf 1                                                   |
| Zm00001d048536 | SKP1-like protein 21                                            |

|                |                              |
|----------------|------------------------------|
| Zm00001d048541 | uncharacterized              |
| Zm00001d049814 | uncharacterized              |
| Zm00001d051566 | LOC100191766-like pseudogene |
| Zm00001d051742 | uncharacterized              |

---
